# Supplementary material for: Facile fabrication of nanocomposite microcapsules by combining layer-by-layer self-assembly and Pickering emulsion templating
Source: Royal Society of Chemistry journal article supplement (doi:10.1039/c4ra00089g), 2014-01-01
Supplement: c4ra00089g1.pdf [file c4ra00089g1.pdf]

## **Electronic Supplementary Information**

**Facile fabrication of nanocomposite microcapsules by combining  
layer-by-layer self-assembly and Pickering emulsion templating**

**Hao Liu, Xiaoyu Gu, Meng Hu, Yang Hu, and Chaoyang Wang\***

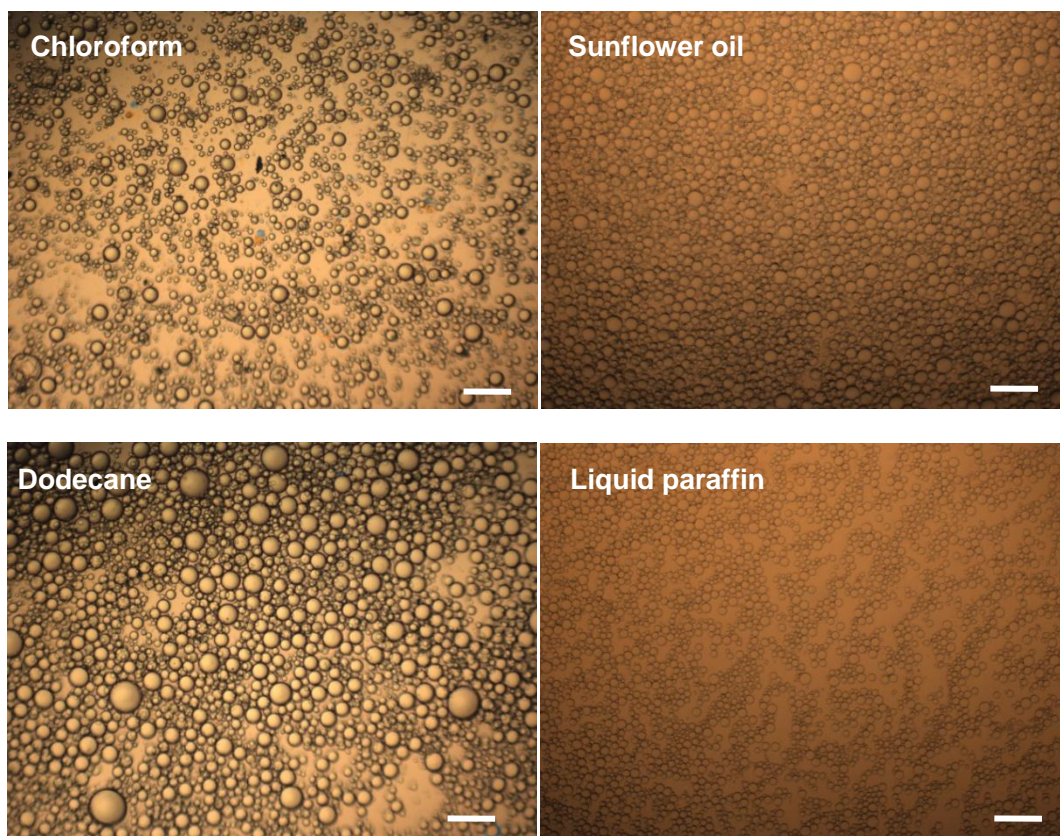

**Fig. S1** Optical micrographs of Pickering emulsions prepared using different oils. The concentration of Laponite is 0.25 wt%, PEI/Laponite mass ratio is 0.5. All scale bars represent 100  $\mu\text{m}$ .

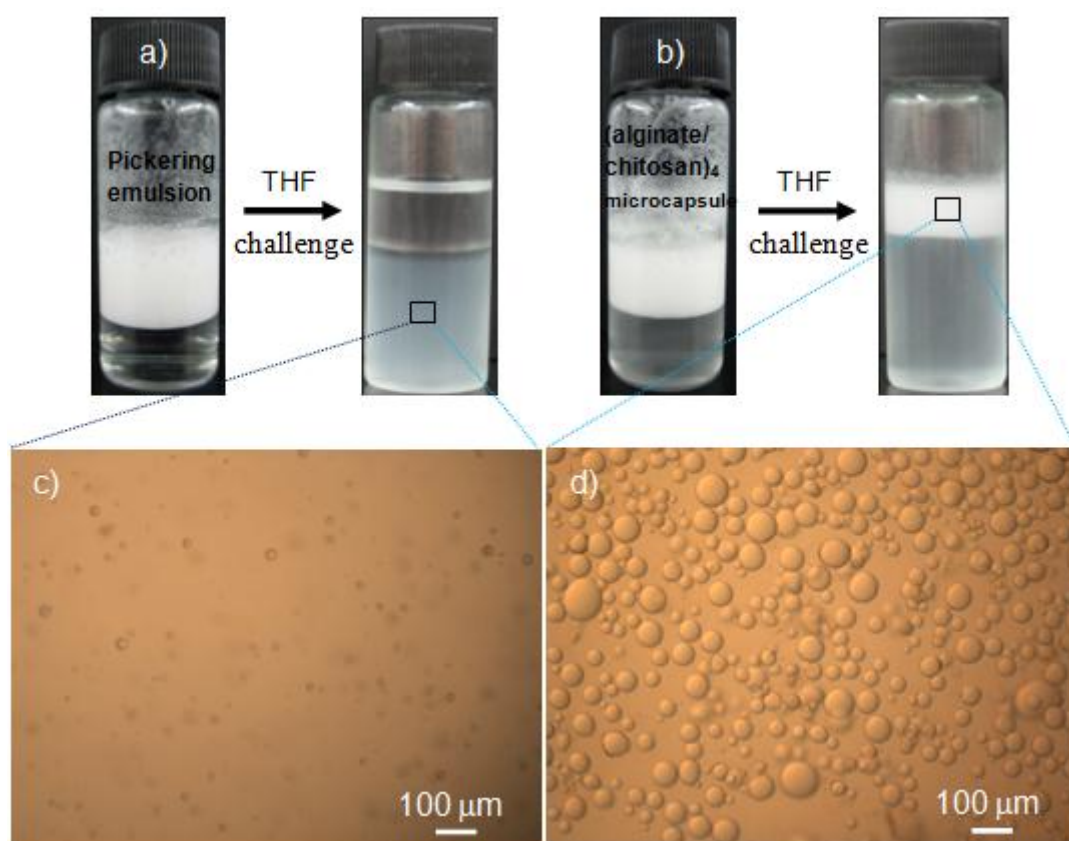

**Fig. S2.** Digital photographs of the clean Pickering emulsion (a) and (ALG/CS)<sub>4</sub> microcapsules (b) following a THF challenge. Optical microscopy images of the clean Pickering emulsion (c) and (ALG/CS)<sub>4</sub> microcapsules (d) after a THF challenge. Laponite concentration is 0.25 wt. %. PEI/Laponite mass ratio is 0.5.

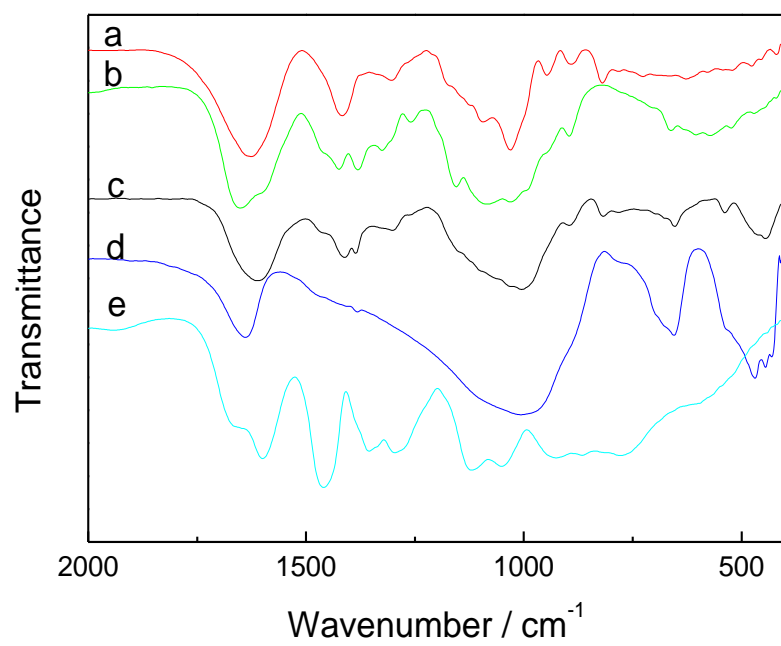

**Fig. S3.** FTIR spectra of (a) ALG, (b) CS, (c) microcapsule, (d) Laponite, and (e) PEI.

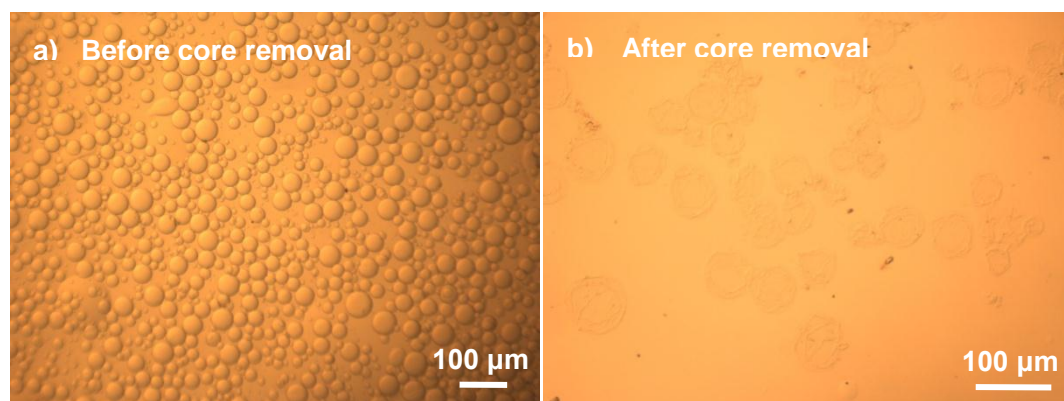

**Fig. S4.** Optical images of the (ALG/CS)<sub>4</sub> microcapsules before and after core removal.
